# Supplementary material for: Drosophila WASH is required for integrin-mediated cell adhesion, cell motility and lysosomal neutralization
Source: Oxford University Press journal article supplement (doi:10.1242/jcs.193086), 2016-11-25
Supplement: jcs193086supp.pdf [file jcs193086supp.pdf]

## Supplementary material

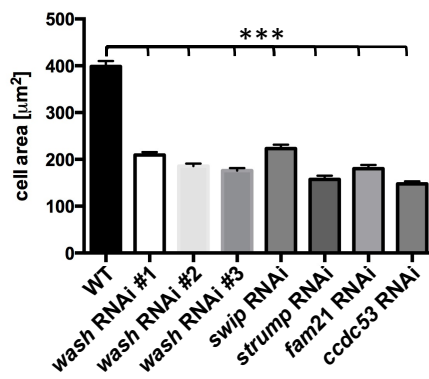

### Supplementary figure S1

WASH is associated in a pentameric complex whose stability depends on each member. When single complex members are knocked down by RNAi, macrophages are unable to spread properly, comparable to the *wash* mutant situation (n = 200 per genotype). \*\*\* =  $p < 0.0001$ , error bars represent SEM.

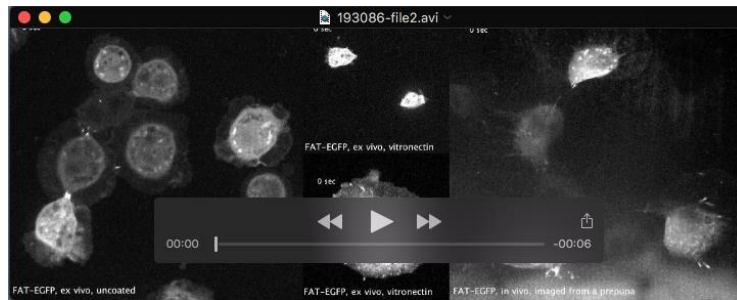

### Supplementary Movie M1

Spinning disc microscopy time-lapse movie of macrophages expressing EGFP- FAT using the *hml*ΔGal4 driver *ex vivo* plated on coated and uncoated surfaces, as well as *in vivo* in a prepupa.

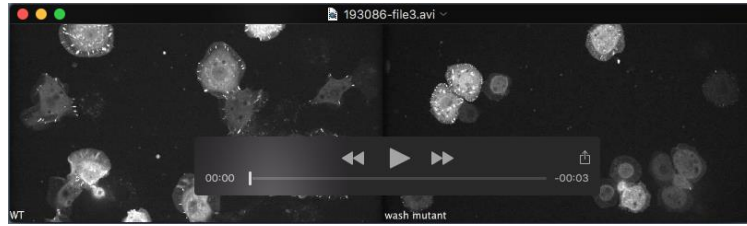

### Supplementary Movie M2

Spinning disc microscopy time-lapse movie of *ex vivo* cultured wild type and *wash* $\Delta$ 185\* mutant macrophages expressing EGFP-FAT using the *hml* $\Delta$ Gal4 driver.

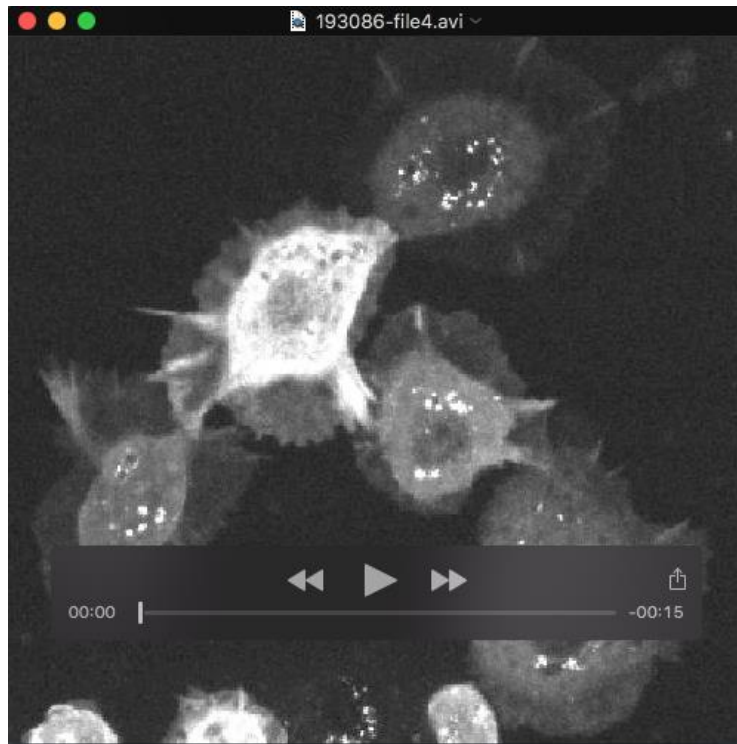

### Supplementary Movie M3

Spinning disc microscopy time-lapse movie of *ex vivo* cultured macrophages expressing WASH-EGFP using the *hml*ΔGal4 driver.

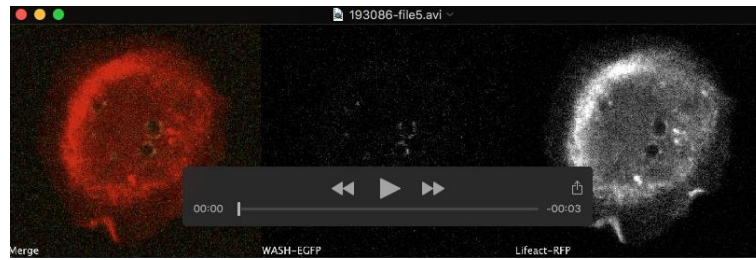

### Supplementary Movie M4

Spinning disc microscopy time-lapse movie of *ex vivo* cultured macrophages expressing WASH-EGFP and Lifeact-RFP using the *hml*ΔGal4 driver.

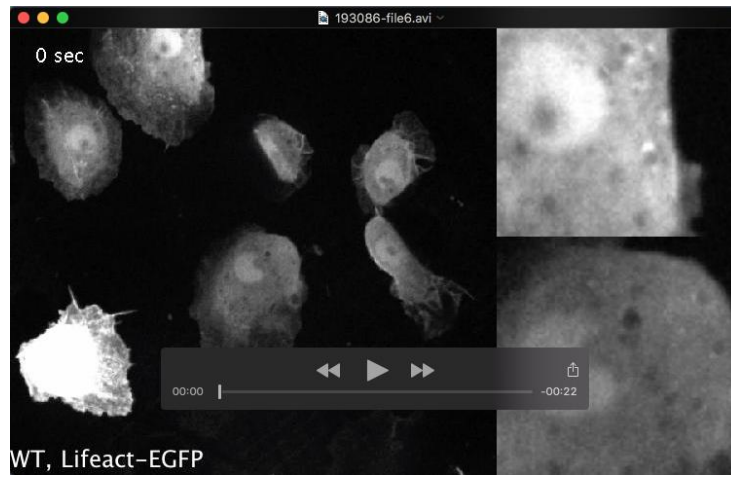

### Supplementary Movie M5

Spinning disc microscopy time-lapse movie of *ex vivo* cultured macrophages expressing Lifact-EGFP using the *hm* $\Delta$ Gal4 driver.

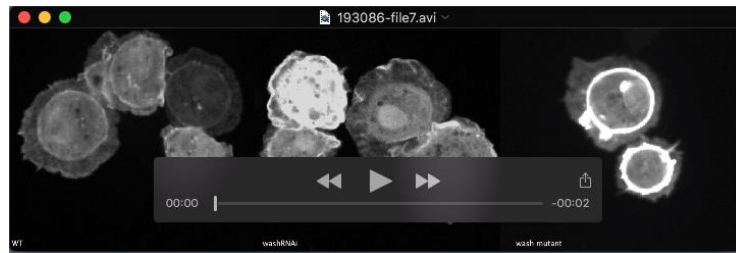

### Supplementary Movie M6

Spinning disc microscopy time-lapse movie of *ex vivo* cultured (A) wild type (B) *wash*RNAi depleted and (C) *wash* $\Delta$ 185\* mutant macrophages expressing Lifeact-EGFP using the *hml* $\Delta$ Gal4 driver.

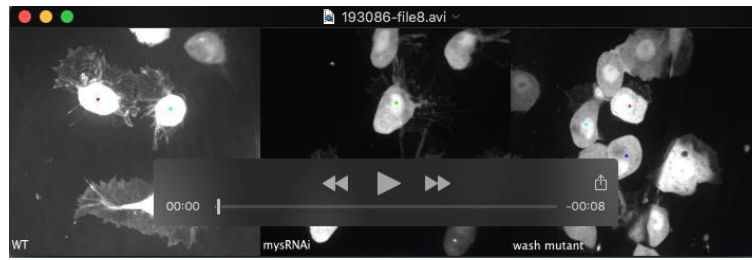

### Supplementary Movie M7

Spinning disc microscopy video of migrating (A) wild type, (B)  $\beta$ PS-integrin knockdown and (C) *wash* $\Delta$ 185\* mutant macrophages expressing a EGFP transgene imaged from a living prepupa (2 h APF). Migratory tracks of individual cells are indicated (colored, jagged lines).



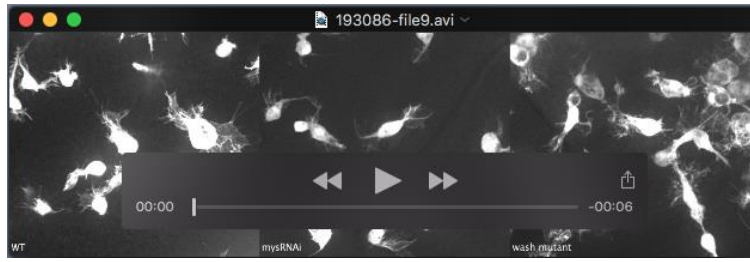

### Supplementary Movie M8

Spinning disc microscopy video of migrating (A) wild type, (B)  $\beta$ PS-integrin knockdown and (C) *wash* $\Delta$ 185\* mutant macrophages expressing a EGFP transgene imaged from a pupal wing (17 h APF) upon laser-induced cell ablation.

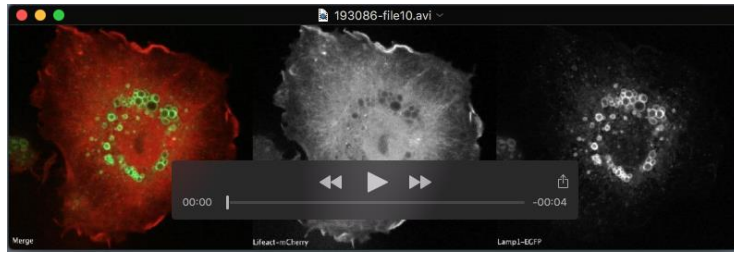

### **Supplementary Movie M9**

Spinning disc microscopy time-lapse movie of cultured S2R<sup>+</sup> cells transfected with Lifeact-mCherry and Lamp1-EGFP.

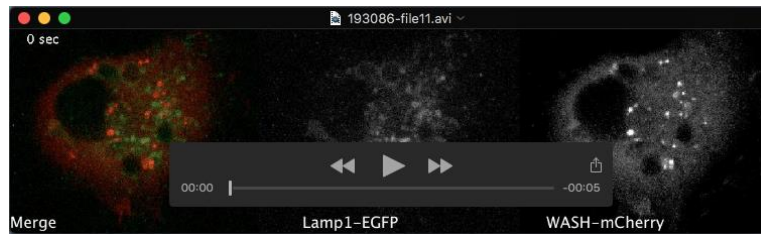

### **Supplementary Movie M10**

Spinning disc microscopy time-lapse movie of cultured S2R<sup>+</sup> cells transfected with WASH-mCherry and Lamp1-EGFP.

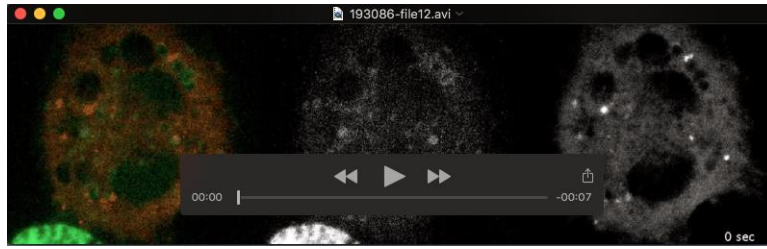

### **Supplementary Movie M11**

Spinning disc microscopy time-lapse movie of cultured S2R<sup>+</sup> cells transfected with WASH-mCherry and Vha55-EGFP.

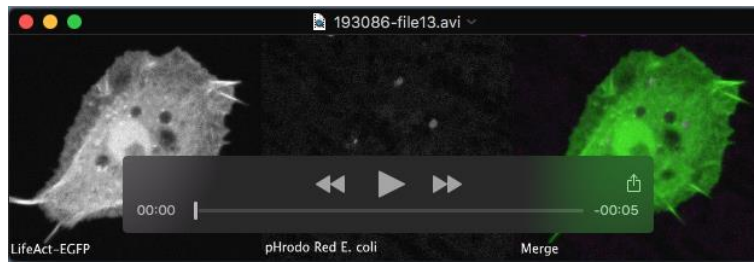

### Supplementary Movie M12

Spinning disc microscopy time-lapse movie of an *ex vivo* cultured macrophage expressing Lifeact-EGFP using the *hml* $\Delta$ Gal4 driver phagocytosing pHrodo-conjugated *E. coli*

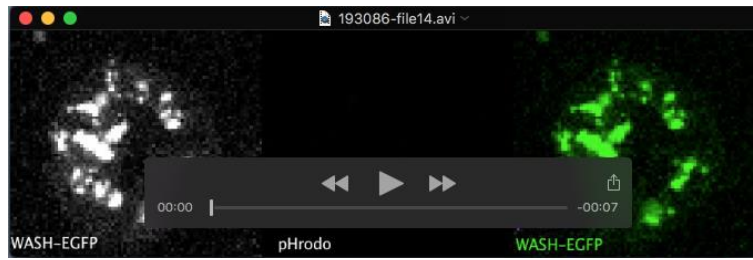

### Supplementary Movie M13

Spinning disc microscopy time-lapse movie of an *ex vivo* cultured macrophage expressing WASH-EGFP (green) and phagocytosing pHrodo (magenta). WASH-EGFP is recruited to phagolysosomes with internalized *E. coli* pHrodo particles upon acidification.
